# Supplementary material
Source: PubMed Central journal article supplement (PMC1302268)
Supplement: biophysj_83_4_1731__1.pdf [file biophysj_83_4_1731__1.pdf]

## Combining Conformational Flexibility and Continuum Electrostatics for Calculating pK<sub>a</sub>'s in Proteins

R.E. Georgescu, E.G. Alexov, and M.R. Gunner

**Supplementary material: Biophysical Journal Oct. 2002**

**SM I-X:** Experimental and calculated pK<sub>a</sub>'s for residues with measured pK<sub>a</sub>'s. Residue name is underlined if it has electrostatic interactions with another residue of more than -3 ApK units (-4.08 kcal/mol). If the residue name is in bold the ionized form has lost more than 3 ApK units of reaction field energy ( $\Delta\Delta G_{\text{rxn}} > 4.08$  kcal/mol). Only the initial heavy atom conformer in the starred protein data file is used to determine if a residue is in either category.

Expt: Experimental pK<sub>a</sub>'s; ±: Reported error of experimental measurements; n: reported Hill coefficient value (underlined, if the n values were explicitly reported otherwise n was estimated from the shape of published titration curves).

The columns headed by protein data file name contains the calculated pK<sub>a</sub>'s. Err: Difference between calculated and experimental value. Absolute errors greater than 1 pH unit in bold while those greater than 2 pH units are also underlined. #: SCCE: Single Conformation Continuum Electrostatics. All other calculations obtained with MCCE. \*: Representative calculation for this protein. §: Calculations using NMR structures. All other coordinates obtained by x-ray crystallography. For the NMR structures the pK<sub>a</sub> is the average value for the ensemble of structures;

RMSV: Root-mean-square-variation of pK<sub>a</sub>'s calculated for a given residue (J) in the group of n structures is  $\text{sqrt}\left(\frac{1}{n} \sum_{j=1}^n (pK_{av} - pK_j)^2\right)$ . All calculations carried out with 0.15 M ionic strength and  $\square_{\text{prot}}=4$  except for ¶ where  $\square_{\text{prot}}=8$  and || where  $\square_{\text{prot}}=20$ . RMS: root-mean-square error of computed pK<sub>a</sub>'s for a given protein data file is  $\text{sqrt}\left(\frac{1}{N} \sum_{i=1}^N (pK_{\text{exp}} - pK_{\text{calc}})^2\right)$  where N is the number of residues with known pK<sub>a</sub>'s; Conf:

Number of conformers in the calculation. Several proteins have ions that influence residue pK<sub>a</sub>'s. +: Ion included; -: no ion.

**SM.I. *Bacillus amyloliquefaciens* barnase.**

X-ray structures: 1A2P (Martin et al., 1999) and 1B20 (Buckle et al., 1993) and 20 NMR structures in 1BNR (Bycroft et al., 1991). Experimental pK<sub>a</sub>'s (Oliveberg et al., 1995). The pK<sub>a</sub> of His18 (Loewenthal et al., 1993)

|            | Expt       | ±    | n    | #1A2P | #Err | *1A2P       | *Err | 1B20 | Err         | \$1BNR | \$Err       | \$RMSV | ¶1A2P | ¶Err | 1A2P | Err         |
|------------|------------|------|------|-------|------|-------------|------|------|-------------|--------|-------------|--------|-------|------|------|-------------|
| <u>Asp</u> | <u>8</u>   | 3.06 | 0.1  | 0.9   | 1.1  | <b>-2.0</b> | 1.4  | 1.7  | <b>-1.4</b> | 2.0    | <b>-1.0</b> | 1.2    | 3.4   | 0.3  | 3.7  | 0.6         |
| <u>Asp</u> | <u>12</u>  | 3.65 | 0.1  | 0.9   | 2.6  | <b>-1.1</b> | 3.7  | 3.6  | -0.1        | 3.8    | 0.2         | 0.8    | 3.4   | -0.2 | 3.7  | 0.1         |
| <u>Asp</u> | <u>22</u>  | 3.30 | 0.1  | 0.9   | 2.5  | -0.8        | 2.7  | 3.7  | 0.4         | 3.7    | 0.4         | 0.6    | 3.5   | 0.2  | 3.7  | 0.4         |
| <u>Asp</u> | 44         | 3.50 | 0.1  | 0.9   | 4.1  | 0.6         | 4.0  | 3.9  | 0.4         | 3.9    | 0.4         | 0.5    | 4.3   | 0.8  | 4.5  | <b>1.0</b>  |
| <u>Asp</u> | <u>54</u>  | 2.2  | 0.3  | 0.9   | -1.1 | <b>-3.3</b> | 2.3  | 2.8  | 0.6         | 1.8    | -0.4        | 2.6    | 1.3   | -1.0 | 2.5  | 0.4         |
| <u>Asp</u> | <u>75</u>  | 3.10 | 0.2  | \     | 3.9  | 0.8         | 4.5  | 4.8  | 1.7         | 4.6    | 1.5         | 2.3    | 1.4   | -1.8 | 1.5  | <b>-1.6</b> |
| <u>Asp</u> | <u>86</u>  | 4.20 | 0.1  | 0.8   | 5.2  | <b>1.0</b>  | 4.9  | 4.8  | 0.6         | 5.9    | 1.7         | 1.8    | 4.9   | 0.7  | 4.1  | -0.1        |
| <u>Asp</u> | <u>93</u>  | 2    | 0.3  | \     | -1.1 | <b>-3.1</b> | 1.4  | 2.7  | 0.7         | 1.6    | -0.4        | 0.8    | 2.4   | 0.4  | 3.3  | <b>1.3</b>  |
| <u>Asp</u> | 101        | 2.00 | 0.2  | 1.0   | -0.9 | <b>-2.9</b> | 3.2  | 3.3  | <b>1.3</b>  | 3.0    | 1.0         | 1.3    | 2.6   | 0.6  | 3.5  | <b>1.5</b>  |
| <u>Ctr</u> | <u>110</u> | 3.30 | 0.1  | 0.9   | -0.4 | <b>-3.7</b> | 2.7  | 1.9  | <b>-1.4</b> | 3.4    | 0.1         | 1.6    | 2.0   | -1.3 | 1.8  | <b>-1.5</b> |
| <u>Glu</u> | 29         | 3.75 | 0.05 | 0.8   | 1.4  | <b>-2.4</b> | 2.6  | 2.3  | <b>-1.5</b> | 4.5    | 0.8         | 0.8    | 4.1   | 0.4  | 4.3  | 0.5         |
| <u>Glu</u> | <u>60</u>  | 3.20 | 0.1  | 0.9   | 4.1  | 0.9         | 1.8  | 2.9  | -0.3        | 3.6    | 0.4         | 1.3    | 3.1   | -0.1 | 3.4  | 0.2         |
| <u>Glu</u> | <u>73</u>  | 2.1  | 0.1  | 1.2   | -1.0 | <b>-3.1</b> | 0.6  | -0.8 | <b>-2.9</b> | 3.6    | <b>1.5</b>  | 3.2    | 0.6   | -1.5 | 2.5  | 0.4         |
| His        | 18         | 7.72 | 0.05 | 1.0   | 7.0  | -0.7        | 6.6  | 7.0  | -0.8        | 6.8    | -0.9        | 0.1    | 6.6   | -1.1 | 6.6  | <b>-1.2</b> |
| RMS        |            |      |      |       |      | 2.11        | 1.04 |      | 1.26        |        | 0.94        | 1.63   |       | 0.91 |      | 0.89        |
| Conf       |            |      |      |       |      | 96          | 526  |      | 480         |        | 291         |        |       | 450  |      | 299         |

## SM II. Bovine Pancreatic Trypsin Inhibitor.

X-ray structures: 4PTI (Marquart et al., 1983) and 20 NMR structures in 1PTI (Bernrdt et al., 1992). Experimental pK<sub>a</sub>'s (Brown et al., 1976; March et al., 1982)

|            | Expt.     | Err.  | n   | #4PTI | #Err. | *4PTI       | Err  | \$1PTI      | \$Err | \$RMSV     | ¶4PTI | ¶Err | 4PTI | Err  |      |
|------------|-----------|-------|-----|-------|-------|-------------|------|-------------|-------|------------|-------|------|------|------|------|
| Asp        | 3         | 3.55  | 0.1 | \     | 3.8   | 0.3         | 3.9  | 0.4         | 3.7   | 0.1        | 0.3   | 4.0  | 0.5  | 4.3  | 0.7  |
| Asp        | 50        | 3.20  | 0.0 | \     | 3.4   | 0.2         | 2.3  | -0.9        | 2.6   | -0.6       | 1.0   | 2.9  | -0.3 | 3.0  | -0.2 |
| Ctr        | 58        | 3.10  | 0.3 | 0.9   | 3.4   | 0.3         | 3.7  | 0.6         | 2.7   | -0.4       | 0.5   | 3.8  | 0.7  | 3.8  | 0.7  |
| Glu        | 7         | 3.85  | 0.1 | 0.8   | 5.6   | <b>1.7</b>  | 2.6  | <b>-1.3</b> | 3.1   | -0.7       | 1.4   | 4.5  | 0.6  | 4.1  | 0.2  |
| Glu        | 49        | 3.91  | 0.1 | \     | 3.2   | -0.7        | 3.9  | 0.0         | 3.5   | -0.4       | 1.1   | 4.4  | 0.5  | 4.4  | 0.5  |
| Lys        | 15        | 10.43 | 0.1 | \     | 10.9  | 0.5         | 10.9 | 0.5         | 10.4  | -0.1       | 0.4   | 11.0 | 0.5  | 10.8 | 0.4  |
| Lys        | 26        | 10.44 | 0.1 | \     | 10.5  | 0.1         | 10.6 | 0.2         | 10.6  | 0.1        | 0.4   | 10.8 | 0.3  | 10.7 | 0.3  |
| Lys        | 41        | 10.75 | 0.1 | \     | 12.1  | <b>1.4</b>  | 11.6 | 0.8         | 11.2  | 0.5        | 1.0   | 11.4 | 0.6  | 11.3 | 0.5  |
| Lys        | 46        | 10.35 | 0.2 | \     | 10.6  | 0.2         | 10.3 | -0.0        | 10.2  | -0.2       | 0.6   | 10.4 | 0.1  | 10.3 | -0.0 |
| Ntr        | 1         | 7.90  | 0.2 | 1.0   | 6.5   | <b>-1.4</b> | 7.7  | -0.2        | 8.3   | 0.4        | 0.8   | 7.8  | -0.1 | 7.9  | -0.0 |
| Tyr        | 10        | 9.46  | 0.0 | 0.7   | 9.0   | -0.4        | 9.4  | -0.0        | 9.7   | 0.3        | 1.6   | 9.4  | -0.1 | 9.9  | 0.4  |
| Tyr        | 21        | 9.94  | 0.0 | 0.8   | 10.1  | 0.2         | 10.3 | 0.4         | 10.6  | 0.6        | 0.7   | 10.2 | 0.3  | 10.4 | 0.5  |
| <b>Tyr</b> | <b>23</b> | 11    | 0.1 | \     | 12.0  | 1.0         | 12.1 | <b>1.1</b>  | 10.6  | -0.4       | 1.5   | 11.0 | 0.0  | 10.8 | -0.2 |
| <b>Tyr</b> | <b>35</b> | 10.60 | 0.1 | 0.8   | 10.5  | -0.1        | 10.0 | -0.6        | 12.4  | <b>1.8</b> | 3.9   | 9.7  | -0.9 | 10.4 | -0.2 |
| RMS        |           |       |     |       | 0.80  |             | 0.64 |             | 0.62  |            | 1.40  | 0.47 |      | 0.41 |      |
| Conf       |           |       |     |       | 53    |             | 187  |             | 140   |            |       | 138  |      | 131  |      |

### SM-III. Intestinal Bovine Calcium-Binding Protein (Cabd).

X-ray structure: 3ICB (Szebenyi and Moffat, 1986) and the 24 NMR structures in 1CDN (Akke et al., 1995) have calcium bound (holo-enzyme). The 33 NMR structures in 1CLB (Skelton et al., 1995) do not (apo-form). Experimental pK<sub>a</sub>'s (Kesavatera et al., 1996; 1999). The reported error of experimental pK<sub>a</sub> values is less than 0.08.

| Ca <sup>+2</sup> | pK <sub>a</sub> | + | pK <sub>a</sub> | - | n   | + | 3ICB | Err | + | *3ICB | Err | + | §1CDN | + | §Err | §RMSV | §1CLB | §Err | §RMSV | -    | ¶3ICB | ¶Err | ¶RMSV | + | 3ICB | Err |      |
|------------------|-----------------|---|-----------------|---|-----|---|------|-----|---|-------|-----|---|-------|---|------|-------|-------|------|-------|------|-------|------|-------|---|------|-----|------|
| Asp              | 47              |   | 3.00            |   | 0.7 |   |      |     |   |       |     |   |       |   |      |       | 2.9   | -0.1 |       | 0.7  |       |      |       |   |      |     |      |
| Chr              | 75              |   | 3.20            |   | 1.1 |   |      |     |   |       |     |   |       |   |      |       | 4.6   | 1.4  |       | 1.8  |       |      |       |   |      |     |      |
| Glu              | 4               |   | 3.80            |   | 0.8 |   |      |     |   |       |     |   |       |   |      |       | 3.5   | -0.3 |       | 0.7  |       |      |       |   |      |     |      |
| Glu              | 5               |   | 3.40            |   | 0.8 |   |      |     |   |       |     |   |       |   |      |       | 3.1   | -0.3 |       | 1.2  |       |      |       |   |      |     |      |
| Glu              | 11              |   | 4.70            |   | 0.7 |   |      |     |   |       |     |   |       |   |      |       | 4.9   | 0.2  |       | 0.8  |       |      |       |   |      |     |      |
| Glu              | 17              |   | 3.62            |   | 0.6 |   |      |     |   |       |     |   |       |   |      |       | 4.1   | 0.5  |       | 2.9  |       |      |       |   |      |     |      |
| Glu              | 26              |   | 4.10            |   | 0.9 |   |      |     |   |       |     |   |       |   |      |       | 2.7   | -1.4 |       | 1.8  |       |      |       |   |      |     |      |
| Glu              | 48              |   | 4.60            |   | 0.6 |   |      |     |   |       |     |   |       |   |      |       | 4.4   | -0.2 |       | 0.9  |       |      |       |   |      |     |      |
| Glu              | 64              |   | 3.80            |   | 0.8 |   |      |     |   |       |     |   |       |   |      |       | 4.3   | 0.5  |       | 0.7  |       |      |       |   |      |     |      |
| Lys              | 1               |   | 10.60           |   | 0.7 |   |      |     |   |       |     |   |       |   |      |       | 9.7   | -0.9 |       | 2.2  |       |      |       |   |      |     | 1.2  |
| Lys              | 7               |   | 11.35           |   | 0.9 |   |      |     |   |       |     |   |       |   |      |       | 10.9  | -0.5 |       | 1.0  |       |      |       |   |      |     | 0.5  |
| Lys              | 12              |   | 10.82           |   | 0.7 |   |      |     |   |       |     |   |       |   |      |       | 10.9  | -0.1 |       | 0.5  |       |      |       |   |      |     | 0.9  |
| Lys              | 16              |   | 10.09           |   | 0.7 |   |      |     |   |       |     |   |       |   |      |       | 11.2  | 0.3  |       | 2.2  |       |      |       |   |      |     | 1.4  |
| Lys              | 25              |   | 11.81           |   | 0.9 |   |      |     |   |       |     |   |       |   |      |       | 10.1  | 0.0  |       | 0.9  |       |      |       |   |      |     | 0.9  |
| Lys              | 29              |   | 10.97           |   | 0.8 |   |      |     |   |       |     |   |       |   |      |       | 13.3  | 1.4  |       | 1.5  |       |      |       |   |      |     | 0.3  |
| Lys              | 41              |   | 10.89           |   | 0.8 |   |      |     |   |       |     |   |       |   |      |       | 9.5   | -1.5 |       | 1.3  |       |      |       |   |      |     | 0.1  |
| Lys              | 55              |   | 11.38           |   | 0.9 |   |      |     |   |       |     |   |       |   |      |       | 10.9  | 0.0  |       | 0.9  |       |      |       |   |      |     | 0.1  |
| Lys              | 71              |   | 10.72           |   | 0.8 |   |      |     |   |       |     |   |       |   |      |       | 10.2  | -1.2 |       | 1.1  |       |      |       |   |      |     | 0.9  |
| Lys              | 72              |   | 10.96           |   | 0.8 |   |      |     |   |       |     |   |       |   |      |       | 10.1  | -0.6 |       | 0.7  |       |      |       |   |      |     | 0.0  |
| RMS              |                 |   |                 |   |     |   |      |     |   |       |     |   |       |   |      |       | 10.8  | -0.2 |       | 1.3  |       |      |       |   |      |     | 0.3  |
| Conf             |                 |   |                 |   |     |   |      |     |   |       |     |   |       |   |      |       | 0.87  |      |       | 0.66 |       |      |       |   |      |     | 0.59 |
|                  |                 |   |                 |   |     |   |      |     |   |       |     |   |       |   |      |       | 72    |      |       | 273  |       |      |       |   |      |     | 146  |
|                  |                 |   |                 |   |     |   |      |     |   |       |     |   |       |   |      |       | 0.47  |      |       | 1.17 |       |      |       |   |      |     | 0.38 |
|                  |                 |   |                 |   |     |   |      |     |   |       |     |   |       |   |      |       | 336   |      |       | 1.27 |       |      |       |   |      |     | 175  |
|                  |                 |   |                 |   |     |   |      |     |   |       |     |   |       |   |      |       | 0.71  |      |       | 1.27 |       |      |       |   |      |     | 146  |
|                  |                 |   |                 |   |     |   |      |     |   |       |     |   |       |   |      |       | 237   |      |       | 1.27 |       |      |       |   |      |     | 146  |

**SM-VI. Rat T-Lymphocyte Adhesion Glycoprotein (CD2).**  
 X-ray structure IHNG (Jones et al., 1992)

|            | Expt      | ±    | n    | #IHNG | #Err | *IHNG       | *Err | ¶IHNG | ¶Err        | IHNG | Err         |
|------------|-----------|------|------|-------|------|-------------|------|-------|-------------|------|-------------|
| Asp        | <u>2</u>  | 3.50 | 0.02 | 0.9   | 3.1  | -0.4        | 3.0  | 3.4   | -0.1        | 3.8  | 0.3         |
| Asp        | 25        | 3.53 | 0.02 | 0.9   | 3.8  | 0.3         | 3.9  | 4.2   | 0.6         | 4.4  | 0.8         |
| Asp        | 26        | 3.58 | 0.03 | 0.9   | 3.9  | 0.4         | 4.1  | 4.2   | 0.7         | 4.5  | 0.9         |
| <u>Asp</u> | <u>28</u> | 3.57 | 0.06 | 0.8   | 1.5  | <b>-2.1</b> | 1.9  | 2.8   | -0.8        | 3.0  | -0.6        |
| <u>Asp</u> | <u>62</u> | 4.18 | 0.03 | 0.8   | 6.5  | <u>2.4</u>  | 5.8  | 5.2   | <b>1.0</b>  | 4.8  | 0.6         |
| Asp        | 71        | 3.20 | 0.10 | 0.8   | 3.8  | 0.6         | 3.8  | 3.9   | 0.7         | 4.4  | <b>1.2</b>  |
| <u>Asp</u> | <u>72</u> | 4.14 | 0.05 | 0.8   | 4.4  | 0.2         | 4.8  | 5.0   | 0.9         | 3.9  | -0.2        |
| Asp        | 94        | 3.83 | 0.04 | 0.8   | 3.0  | -0.8        | 3.4  | 3.9   | 0.1         | 3.6  | -0.2        |
| Ctrl       | 99        | 3.11 | 0.05 | 0.8   | -1.0 | <b>-4.1</b> | 3.8  | 3.8   | 0.7         | 3.9  | 0.8         |
| <u>Glu</u> | <u>29</u> | 4.51 | 0.10 | 0.6   | 1.8  | <b>-2.7</b> | 4.8  | 3.0   | <b>-1.5</b> | 3.7  | -0.9        |
| Glu        | 33        | 4.20 | 0.04 | 0.8   | 4.7  | 0.5         | 4.5  | 4.5   | 0.3         | 4.3  | 0.1         |
| <u>Glu</u> | <u>41</u> | 6.53 | 0.10 | 0.5   | 7.5  | 0.9         | 5.8  | 5.3   | -0.7        | 5.0  | <b>-1.5</b> |
| Glu        | 56        | 3.95 | 0.02 | 0.8   | 3.9  | -0.0        | 4.0  | 4.0   | 0.0         | 3.9  | -0.0        |
| Glu        | 99        | 4.10 | 0.05 | 0.8   | 4.6  | 0.5         | 4.0  | 4.0   | -0.1        | 3.9  | -0.2        |
| RMS        |           |      |      |       |      |             |      |       |             | 1.62 | 0.77        |
| Conf       |           |      |      |       |      |             |      |       |             | 154  | 398         |
|            |           |      |      |       |      |             |      |       |             | 309  | 285         |

**SM-V. Hen Egg-White Lysozyme (HEWL).**

X-ray structures: IBOD (Vaney et al., 1996); 2LZT (Ramanadham et al., 1981), IHEL (Wilson et al., 1992). NMR structure IE8L (Schwalbe et al., 2001). Experimental data (Kuramitsu and Hamaguchi, 1980; Bartik et al., 1994). SCCE columns show only errors of calculated pK<sub>a</sub>'s for 2LZT and IBOD.

|            | Expt      | ±     | n   | #2LZT<br>err. | #IBOD<br>err. | *IBOD<br>Err | 2LZT<br>Err | 2HEL<br>Err | §IE8L<br>Err | §Err        | §RMSV | ¶2LZT       | ¶Err | 2LZT        | Err |      |            |      |             |
|------------|-----------|-------|-----|---------------|---------------|--------------|-------------|-------------|--------------|-------------|-------|-------------|------|-------------|-----|------|------------|------|-------------|
| Asp        | 18        | 2.66  | 0.1 | 0.8           | -0.1          | 0.3          | 3.0         | 0.4         | 2.8          | 0.2         | 2.2   | -0.5        | 3.6  | 0.9         | 0.5 | 3.6  | 1.0        | 3.5  | 0.8         |
| <b>Asp</b> | <b>48</b> | 1.60  | 0.4 | \             | -0.7          | <b>2.1</b>   | 0.6         | <b>-1.0</b> | 1.7          | 0.1         | -0.2  | <b>-1.8</b> | 3.2  | <b>1.6</b>  | 0.2 | 2.6  | 1.0        | 4.1  | <b>2.5</b>  |
| <b>Asp</b> | <b>52</b> | 3.68  | 0.1 | 0.8           | <b>-3.4</b>   | <b>-4.1</b>  | 3.9         | 0.2         | 3.0          | -0.7        | 4.6   | 0.9         | 3.8  | 0.1         | 2.5 | 4.5  | 0.9        | 3.5  | -0.2        |
| <b>Asp</b> | <b>66</b> | 0.90  | 0.5 | \             | <b>1.9</b>    | <b>1.9</b>   | 1.5         | 0.6         | 2.6          | <b>1.7</b>  | 1.8   | 0.9         | 2.7  | <b>1.8</b>  | 0.8 | 1.4  | 0.5        | 1.9  | <b>1.0</b>  |
| Asp        | 87        | 2.07  | 0.2 | \             | 0.7           | <b>3.1</b>   | 1.0         | <b>-1.1</b> | 1.2          | -0.9        | 1.2   | -0.9        | 1.7  | -0.3        | 0.3 | 2.7  | 0.6        | 3.5  | <b>1.5</b>  |
| Asp        | 101       | 4.08  | 0.1 | \             | <b>-4.7</b>   | 0.5          | 3.8         | -0.3        | 5.1          | 1.0         | 4.3   | 0.2         | 4.1  | 0.0         | 0.2 | 4.2  | 0.1        | 4.1  | 0.1         |
| Asp        | 119       | 3.20  | 0.1 | \             | -0.1          | -0.3         | 4.1         | 0.9         | 2.4          | -0.8        | 3.8   | 0.6         | 3.3  | 0.1         | 0.4 | 4.4  | <b>1.2</b> | 3.7  | 0.5         |
| Chr        | 129       | 2.75  | 0.1 | \             | <b>-3.8</b>   | 0.8          | 2.4         | -0.4        | 2.6          | -0.1        | 3.0   | 0.2         | 2.5  | -0.3        | 0.6 | 2.5  | -0.2       | 3.0  | 0.2         |
| <b>GlU</b> | <b>7</b>  | 2.85  | 0.3 | \             | 1.0           | <b>2.4</b>   | 3.5         | 0.6         | 2.2          | -0.6        | 2.2   | -0.6        | 3.3  | 0.5         | 0.2 | 3.1  | 0.2        | 3.5  | 0.7         |
| <b>GlU</b> | <b>35</b> | 6.20  | 0.1 | \             | 0.8           | <b>1.3</b>   | 6.2         | 0.0         | 6.2          | -0.0        | 6.6   | 0.4         | 6.8  | 0.6         | 6.8 | 5.7  | -0.5       | 4.8  | <b>-1.4</b> |
| His        | 15        | 5.36  | 0.1 | \             | <b>-1.5</b>   | <b>-1.8</b>  | 6.5         | <b>1.1</b>  | 6.4          | <b>1.0</b>  | 6.8   | <b>1.5</b>  | 5.8  | 0.5         | 0.3 | 5.7  | 0.3        | 5.5  | 0.1         |
| Lys        | 1         | 10.80 | 0.1 | \             | 0.8           | <b>-1.7</b>  | 10.3        | -0.5        | 9.8          | -1.0        | 10.2  | -0.6        | 10.3 | -0.5        | 1.0 | 12.1 | <b>1.3</b> | 10.3 | -0.5        |
| Lys        | 13        | 10.50 | 0.1 | \             | <b>3.8</b>    | -0.9         | 11.2        | 0.7         | 10.8         | 0.3         | 10.7  | 0.2         | 10.9 | 0.4         | 0.4 | 11.2 | 0.7        | 11.2 | 0.7         |
| Lys        | 33        | 10.40 | 0.1 | \             | <b>1.9</b>    | <b>1.3</b>   | 9.8         | -0.6        | 8.9          | <b>-1.5</b> | 9.5   | -0.9        | 9.1  | <b>-1.3</b> | 1.4 | 10.3 | -0.1       | 10.2 | -0.2        |
| Lys        | 96        | 10.80 | 0.1 | \             | 0.7           | <b>-1.4</b>  | 11.3        | 0.5         | 11.9         | <b>1.1</b>  | 11.8  | 1.0         | 10.8 | 0.0         | 0.8 | 12.2 | 1.4        | 11.5 | 0.7         |
| Lys        | 97        | 10.30 | 0.1 | \             | 1.0           | -0.6         | 10.5        | 0.2         | 11.1         | 0.8         | 10.8  | 0.5         | 10.6 | 0.3         | 0.7 | 10.8 | 0.5        | 11.4 | <b>1.1</b>  |
| Lys        | 116       | 10.20 | 0.1 | \             | 0.2           | <b>1.5</b>   | 10.0        | -0.2        | 9.5          | -0.7        | 9.4   | -0.8        | 9.8  | -0.4        | 0.7 | 10.5 | 0.3        | 10.4 | 0.2         |
| Tyr        | 20        | 10.30 | 0.1 | \             | <b>-1.8</b>   | <b>1.3</b>   | 9.7         | -0.6        | 11.1         | 0.8         | 9.6   | -0.7        | 9.7  | -0.6        | 1.0 | 9.5  | -0.8       | 10.4 | 0.1         |
| Tyr        | 23        | 9.80  | 0.1 | \             | -0.8          | 0.5          | 9.3         | -0.5        | 9.3          | -0.5        | 9.7   | -0.1        | 9.3  | -0.5        | 0.7 | 9.6  | -0.2       | 9.9  | 0.1         |
| RMS        |           |       |     |               | 2.05          | 1.74         | 0.63        | 0.86        | 0.81         | 0.73        | 1.77  | 0.74        | 0.90 | 0.90        | 0.1 |      |            |      |             |
| Conf       |           |       |     |               | 104           | 451          | 466         | 443         | 253          | 331         | 288   |             |      |             |     |      |            |      |             |

**SM-VI. Third domain of the turkey ovomucoid inhibitor (OMTKY3).**

X-ray structures: 1PPF (Bode et al., 1986), 1CHO (Fujinaga et al., 1987) and 3SGB (Read et al., 1983). The 50 NMR structures in 1OMU (Hoogstraten et al., 1995). Experimental data (Schaller and Roberston, 1995; Forsyth et al., 1998)

|      | Expt | $\pm$ | n   | #1PPF | #Err | *1PPF | Err  | 1CHO | Err  | 3SGB | Err  | \$1OMU | \$Err | \$RMSV | ¶1PPF | ¶Err | 1PPF | Err  |      |     |
|------|------|-------|-----|-------|------|-------|------|------|------|------|------|--------|-------|--------|-------|------|------|------|------|-----|
| Asp  | 7    | 2.7   | 0.1 | 0.7   | 0.4  | -2.3  | 2.8  | 0.1  | 4.2  | 1.5  | 2.7  | -0.0   | 2.9   | 0.3    | 0.5   | 4.0  | 1.3  | 5.0  | 2.3  |     |
| Asp  | 27   | 2.3   | 0.1 | 0.9   | 3.9  | 1.6   | 3.3  | 0.9  | 2.7  | 0.4  | 2.3  | 0.0    | 3.2   | 0.9    | 0.5   | 4.0  | 1.7  | 3.6  | 1.3  |     |
| Cr   | 56   | 2.2   | 0.2 | 0.9   | 2.7  | 0.5   | 3.2  | 0.9  | 3.2  | 0.9  | 3.2  | 0.9    | 3.3   | 1.1    | 0.9   | 3.2  | 1.0  | 3.3  | 1.1  |     |
| Glu  | 10   | 4.1   | 0.2 | 0.9   | 3.7  | -0.4  | 3.5  | -0.6 | 3.9  | -0.2 | 4.2  | 0.1    | 3.7   | -0.4   | 0.6   | 3.7  | -0.4 | 3.8  | -0.3 |     |
| Glu  | 19   | 3.2   | 0.0 | 1.1   | -0.3 | -3.5  | 1.6  | -1.6 | 2.9  | -0.3 | 2.7  | -0.5   | 2.7   | -0.5   | 0.6   | 3.9  | 0.7  | 4.3  | 1.1  |     |
| Glu  | 43   | 4.8   | 0.2 | 1.0   | 4.6  | -0.2  | 4.5  | -0.3 | 4.6  | -0.2 | 4.6  | -0.2   | 4.8   | -0.0   | 0.1   | 4.6  | -0.2 | 4.9  | 0.1  |     |
| His  | 52   | 7.5   | \   | 0.9   | 8.5  | 1.0   | 8.2  | 0.7  | 8.6  | 1.1  | 8.5  | 1.0    | 7.1   | -0.4   | 0.7   | 7.5  | -0.0 | 6.9  | -0.6 |     |
| Lys  | 13   | 9.9   | 0.0 | 0.7   | 14.3 | 4.4   | 11.5 | 1.6  | 10.1 | 0.2  | 10.0 | 0.1    | 11.2  | 1.3    | 1.6   | 11.4 | 1.5  | 12.0 | 2.1  |     |
| Lys  | 29   | 11.1  | 0.1 | 0.9   | 11.7 | 0.6   | 11.2 | 0.1  | 10.9 | -0.2 | 10.8 | -0.3   | 10.4  | -0.7   | 1.1   | 11.4 | 0.3  | 11.3 | 0.2  |     |
| Lys  | 34   | 10.1  | 0.1 | 0.7   | 12.4 | 2.3   | 7.2  | -2.9 | 8.8  | -1.3 | 10.1 | 0.0    | 7.6   | -2.5   | 1.3   | 12.6 | 2.5  | 12.0 | 1.9  |     |
| Lys  | 55   | 11.1  | 0.1 | 0.6   | 10.3 | -0.8  | 10.2 | -0.9 | 10.8 | -0.3 | 11.7 | 0.6    | 10.8  | -0.3   | 0.6   | 10.7 | -0.4 | 10.9 | -0.2 |     |
| Ntr  | 1    | 8.0   | 0.0 | 0.9   | 5.9  | -2.0  | 7.3  | -0.7 | 7.3  | -0.7 |      |        | 8.4   | 0.4    | 0.5   | 7.4  | -0.5 | 7.6  | -0.4 |     |
| Tyr  | 11   | 10.2  | 0.1 | 0.7   | 8.9  | -1.3  | 11.8 | 1.6  | 13.7 | 3.5  | 14.6 | 4.4    | 12.7  | 2.5    | 1.5   | 10.3 | 0.1  | 10.5 | 0.3  |     |
| Tyr  | 20   | 11.1  | 0.2 | 0.6   | 9.8  | -1.3  | 10.1 | -1.0 | 10.8 | -0.3 | 9.4  | -1.7   | 10.6  | -0.5   | 0.7   | 9.8  | -1.3 | 10.1 | -1.0 |     |
| Tyr  | 31   | 12.5  | \   | \     | 15.0 | 3.0   | 12.2 | -0.3 | 14.4 | 1.9  | 13.0 | 0.5    | 12.5  | 0.0    | 0.3   | 11.4 | -1.1 | 13.9 | 1.5  |     |
| RMS  |      |       |     |       | 2.06 |       |      | 1.19 |      | 1.24 |      | 1.34   |       | 0.87   |       | 1.10 |      | 1.19 |      |     |
| Conf |      |       |     |       | 51   |       |      | 213  |      | 219  |      | 167    |       |        |       | 164  |      | 154  |      | 122 |

### SM-VII. B1 immunoglobulin-binding domain of streptococcal protein G.

X-ray structures 1PGA (Gallagher et al., 1994), 60 NMR structures in 1GBL (Gronenborn et al., 1991). Experimental pK<sub>a</sub>'s (Khare et al., 1997). Estimated n-values are all in the range 0.9 - 1.

|            | Expt      | ±    | #1PGA | #Err | *1PGA       | *Err | \$1GBL      | \$Err | \$RMSV     | 1PGA | Err  | 1PGA       | Err  |             |
|------------|-----------|------|-------|------|-------------|------|-------------|-------|------------|------|------|------------|------|-------------|
| Asp        | 22        | 2.9  | 0.1   | 0.5  | <u>-2.4</u> | 2.2  | -0.7        | 2.6   | -0.3       | 1.0  | 3.1  | 0.2        | 3.7  | 0.8         |
| Asp        | 36        | 3.8  | 0.1   | 5.3  | <b>1.5</b>  | 5.0  | <b>1.2</b>  | 4.7   | 0.9        | 0.7  | 5.2  | <b>1.4</b> | 5.0  | <b>1.2</b>  |
| Asp        | 40        | 4.0  | 0.2   | 4.5  | 0.5         | 4.1  | 0.1         | 5.4   | <b>1.4</b> | 0.9  | 4.7  | 0.7        | 5.0  | <b>1.0</b>  |
| Asp        | 46        | 3.6  | 0.1   | 1.6  | <b>-2.0</b> | 3.1  | -0.5        | 3.7   | 0.1        | 0.3  | 4.2  | 0.6        | 4.4  | 0.8         |
| Asp        | 47        | 3.4  | 0.3   | 0.3  | <b>-3.2</b> | 2.3  | <b>-1.1</b> | 4.4   | <b>1.0</b> | 0.2  | 3.0  | -0.4       | 3.2  | -0.2        |
| Ctr        | 56        | 4.0  | 0.1   | 3.0  | -1.0        | 3.3  | -0.7        | 4.3   | 0.3        | 0.9  | 3.5  | -0.5       | 3.7  | -0.4        |
| <b>Glu</b> | <b>56</b> | 4.0  | 0.1   | 3.9  | -0.1        | 5.3  | <b>1.3</b>  | 6.8   | <b>2.8</b> | 0.8  | 4.9  | 0.9        | 4.7  | 0.7         |
| <u>Glu</u> | <u>15</u> | 4.4  | 0.1   | 1.7  | <u>-2.7</u> | 3.8  | -0.6        | 4.3   | -0.1       | 0.6  | 3.8  | -0.6       | 4.1  | -0.3        |
| <u>Glu</u> | <u>19</u> | 3.7  | 0.2   | 2.7  | -1.0        | 3.5  | -0.2        | 4.2   | 0.5        | 0.2  | 3.9  | 0.2        | 4.0  | 0.3         |
| <u>Glu</u> | <u>27</u> | 4.5  | 0.1   | -0.5 | <b>-5.0</b> | 3.8  | -0.7        | 4.5   | 0.0        | 0.2  | 3.9  | -0.6       | 3.3  | <b>-1.2</b> |
| Glu        | 42        | 4.4  | 0.1   | 5.0  | 0.6         | 5.1  | 0.7         | 5.0   | 0.6        | 0.5  | 5.0  | 0.6        | 5.2  | 0.8         |
| Lys        | 10        | 11.0 | \     | 11.9 | 0.9         | 11.4 | 0.4         | 11.1  | 0.1        | 0.4  | 11.2 | 0.2        | 11.5 | 0.5         |
| Lys        | 13        | 11.0 | \     | 11.0 | -0.0        | 10.8 | -0.2        | 10.8  | -0.2       | 0.6  | 11.0 | -0.0       | 11.5 | 0.5         |
| <u>Lys</u> | <u>28</u> | 10.9 | \     | 13.4 | <b>2.5</b>  | 11.7 | 0.8         | 10.2  | -0.7       | 0.7  | 11.8 | 0.9        | 12.0 | <b>1.1</b>  |
| <b>Tyr</b> | <b>33</b> | 11.0 | \     | 10.7 | -0.3        | 10.8 | -0.2        | 10.3  | -0.7       | 0.2  | 10.5 | -0.5       | 10.9 | -0.1        |
| RMS        |           |      |       |      | 2.13        |      | 0.67        |       | 0.65       | 0.60 |      | 0.63       |      | 0.75        |
| Conf       |           |      |       |      | 55          |      | 240         |       | 202        |      |      | 143        |      | 107         |



### SM-VIII Ribonuclease A (RNase A).

X-ray structures 3RN3 (Howlin et al., 1989), 7RSA (Wlodawer et al., 1988) and the 32 NMR structures in 2AAS (Santoro et al., 1993). Experimental values (Antosiewicz et al., 1996). His pK<sub>a</sub> values averages experimental data (Ruterjans and Witzel, 1969; Matthews and Westmoreland, 1973; Walters and Allerhand, 1980). Only the pK<sub>a</sub>'s of His 12 and 19 are effected by added PO<sub>4</sub>. +: with PO<sub>4</sub>. Experimental values from (Meadows et al., 1969; Cohen et al., 1973).

Calculations had PO<sub>4</sub> dynamically equilibrated with the protein during Monte Carlo sampling. -: no PO<sub>4</sub>.

| PO <sub>4</sub> | Expt        | +     |       | +*    |             | +    |            | -     |      | +          |       | +     |            | Err. |      |
|-----------------|-------------|-------|-------|-------|-------------|------|------------|-------|------|------------|-------|-------|------------|------|------|
|                 |             | #3RN3 | #Err. | *3RN3 | *Err.       | 7RSA | Err.       | §2AAS | §Err | §RMSV      | ¶3RN3 | ¶Err. | 3RN3       |      |      |
| <b>Asp</b>      | <b>14</b>   | 2     | 0.2   | -1.0  | <b>-3.0</b> | 0.6  | -1.4       | 0.6   | 4.9  | <b>2.9</b> | 5.5   | 1.3   | -0.7       | 2.8  | 0.8  |
| Asp             | 38          | 3.1   | 0.2   | 3.0   | -0.1        | 3.0  | -0.1       | 1.7   | 3.1  | 0.0        | 0.4   | 3.6   | 0.5        | 3.8  | 0.7  |
| Asp             | 53          | 3.9   | 0.2   | 3.4   | -0.5        | 3.7  | -0.2       | 3.4   | 4.0  | 0.1        | 1.2   | 4.3   | 0.4        | 4.3  | 0.4  |
| <b>Asp</b>      | <b>83</b>   | 3.5   | 0.2   | 6.3   | <b>2.8</b>  | 3.8  | 0.3        | 3.2   | 2.7  | -0.8       | 1.2   | 3.6   | 0.1        | 3.1  | -0.4 |
| <b>Asp</b>      | <b>121</b>  | 3.1   | 0.2   | -1.0  | <b>-4.1</b> | 3.2  | 0.1        | 0.5   | 2.2  | -0.9       | 1.4   | 2.7   | -0.4       | 3.0  | -0.1 |
| Ctr             | 124         | 2.4   | 0.2   | -0.0  | <b>-2.4</b> | 1.3  | -1.1       | 0.9   | 1.6  | -0.8       | 1.0   | 1.7   | -0.7       | 2.2  | -0.2 |
| <u>Glu</u>      | <u>2</u>    | 2.8   | 0.2   | -0.6  | <b>-3.4</b> | 1.3  | -1.5       | 5.6   | 2.4  | -0.4       | 1.5   | 2.8   | 0.0        | 3.2  | 0.4  |
| Glu             | 9           | 4     | 0.2   | 5.8   | <b>1.8</b>  | 5.4  | 1.4        | 5.5   | 5.1  | <b>1.1</b> | 1.2   | 5.0   | 1.0        | 4.6  | 0.6  |
| Glu             | 49          | 4.7   | 0.2   | 5.7   | 1.0         | 5.5  | 0.8        | 5.7   | 7.5  | <b>2.8</b> | 2.9   | 5.3   | 0.6        | 5.0  | 0.3  |
| Glu             | 86          | 4.1   | 0.2   | 4.4   | 0.3         | 4.2  | 0.1        | 5.7   | 4.6  | 0.5        | 0.9   | 4.8   | 0.7        | 4.5  | 0.4  |
| Glu             | 111         | 3.5   | 0.2   | 4.4   | 0.9         | 3.9  | 0.4        | 4.3   | 4.8  | <b>1.3</b> | 1.6   | 4.1   | 0.6        | 4.2  | 0.7  |
| <u>His</u>      | <u>12-</u>  | 5.8   | 0.05  | -1.0  | <b>-6.8</b> | 4.2  | -1.6       | 4.2   | 4.7  | -1.1       | 2.0   |       |            |      |      |
|                 | <u>12+</u>  | 7     |       |       |             | 6.7  | -0.3       |       |      |            |       | 6.7   | -0.3       | 6.9  | -0.1 |
| <b>His</b>      | <b>48</b>   | 6.3   | 0.1   | 3.1   | <b>-3.2</b> | 8.8  | <b>2.5</b> | 7.5   | 4.7  | -1.6       | 4.4   | 8.0   | <b>1.7</b> | 6.7  | 0.4  |
| His             | 105         | 6.6   | 0.15  | 6.1   | -0.5        | 5.9  | -0.7       | 6.1   | 6.2  | -0.4       | 0.4   | 6.4   | -0.2       | 6.3  | -0.3 |
| <u>His</u>      | <u>119-</u> | 6.1   | 0.1   | 6.7   | 0.6         | 5.4  | -0.7       | 6.1   | 5.4  | -0.7       | 1.2   |       |            |      |      |
|                 | <u>119+</u> | 7.1   |       |       |             | 6.0  | -1.1       |       |      |            |       | 6.7   | -0.4       | 6.7  | -0.3 |
| Ntr             | 1           | 7.6   | 0.15  | 6.0   | -1.6        | 7.4  | -0.2       | 8.7   | 8.0  | 0.4        | 0.7   | 7.5   | -0.1       | 7.5  | -0.1 |
| RMS             |             |       |       | 2.69  |             |      | 0.98       |       |      |            | 2.21  |       | 0.66       |      | 0.44 |
| Conf            |             |       |       | 123   |             | 406  |            | 422   | 356  |            | 350   |       | 350        |      | 285  |

### SM IX. Ribonuclease Hi (RNase H).

X-ray structure: 2RNN2 (Katayanagi et al., 1992), 1RNNH (Yang et al., 1990), and 1RDDD (Katayanagi et al., 1993) and 8 NMR structures in 1RCH (Yamazaki et al., 1997). The experimental pK<sub>a</sub>'s (in presence or absence of Mg<sup>2+</sup>) are from (Oda et al., 1993; Oda et al., 1994). Experimental values that differ by more than 0.2 pH units are bold; No pK<sub>a</sub>'s with Mg<sup>2+</sup> are reported for His. The reported errors assume that these pK<sub>a</sub>'s are independent of added ion. *The pK<sub>a</sub>'s of Asp 10 are not included in the RMS calculations.* 1RNNH does not contain coordinates for residues 1-3 and 153 through the C-terminal 155.

|                          | Mg <sup>2+</sup>  |                   | Expt              |   | ±    | #2RNN2      | #Err.              | *2RNN2      |                    | *Err. | 1RNNH       |                    | Err | 1RDDD       |                    | Err. | §1rch      |                    | §Err | §RMSV      | ¶2RNN2            |   | ¶Err.              | 2RNN2             |   | Err.               |                   |
|--------------------------|-------------------|-------------------|-------------------|---|------|-------------|--------------------|-------------|--------------------|-------|-------------|--------------------|-----|-------------|--------------------|------|------------|--------------------|------|------------|-------------------|---|--------------------|-------------------|---|--------------------|-------------------|
|                          | -                 | +                 | -                 | + |      |             |                    | -           | +                  |       | -           | +                  |     | -           | +                  |      | -          | +                  |      |            | -                 | + |                    | -                 | + |                    |                   |
| <i>Asp</i>               | <i>10</i>         | <i>6.1</i>        | <i>4.2</i>        |   |      | <i>10.9</i> | <b><i>4.8</i></b>  | <i>10.4</i> | <b><i>4.3</i></b>  |       | <i>15.4</i> | <b><i>9.3</i></b>  |     | <i>8.7</i>  | <b><i>4.5</i></b>  |      | <i>14</i>  | <b><i>7.9</i></b>  |      | <i>3.1</i> | <b><i>8.7</i></b> |   | <i>8.7</i>         | <b><i>2.6</i></b> |   | <i>6.4</i>         | <b><i>0.3</i></b> |
| <i>Asp</i>               | <i>70</i>         | <b><i>2.6</i></b> | <b><i>3.4</i></b> |   | 0.6  | <i>2.4</i>  | <i>-0.2</i>        | <i>2.3</i>  | <i>-0.3</i>        |       | <i>3.2</i>  | <i>0.6</i>         |     | <i>2.4</i>  | <i>-1.0</i>        |      | <i>4.0</i> | <b><i>1.4</i></b>  |      | <i>1.1</i> | <i>3.6</i>        |   | <i>3.6</i>         | <i>1.0</i>        |   | <i>3.9</i>         | <b><i>1.3</i></b> |
| <i>Asp</i>               | <i>94</i>         | <i>3.2</i>        | <i>3.3</i>        |   | 1    | <i>11.9</i> | <b><i>8.7</i></b>  | <i>3.8</i>  | <i>0.6</i>         |       | <i>3.4</i>  | <i>0.2</i>         |     | <i>1.4</i>  | <b><i>-1.9</i></b> |      | <i>3.6</i> | <i>0.4</i>         |      | <i>0.6</i> | <i>3.6</i>        |   | <i>0.4</i>         | <i>3.7</i>        |   | <i>0.5</i>         |                   |
| <i>Asp</i>               | <b><i>102</i></b> | <i>2.0</i>        | <i>2.0</i>        |   | \    | <i>-1.0</i> | <b><i>-3.0</i></b> | <i>2.0</i>  | <i>-0.0</i>        |       | <i>1.4</i>  | <i>-0.6</i>        |     | <i>1.6</i>  | <i>-0.4</i>        |      | <i>2.3</i> | <i>0.3</i>         |      | <i>0.5</i> | <i>1.8</i>        |   | <i>-0.2</i>        | <i>-0.5</i>       |   | <b><i>-2.5</i></b> |                   |
| <i>Asp</i>               | <i>108</i>        | <b><i>3.2</i></b> | <b><i>3.5</i></b> |   | 0.9  | <i>1.7</i>  | <b><i>-1.5</i></b> | <i>2.0</i>  | <b><i>-1.2</i></b> |       | <i>2.0</i>  | <b><i>-1.2</i></b> |     | <i>4.8</i>  | <b><i>1.3</i></b>  |      | <i>4.4</i> | <b><i>1.2</i></b>  |      | <i>1.0</i> | <i>3.1</i>        |   | <i>-0.1</i>        | <i>3.0</i>        |   | <i>-0.2</i>        |                   |
| <i>Asp</i>               | <i>134</i>        | <i>4.1</i>        | <i>4.2</i>        |   | 0.8  | <i>1.0</i>  | <b><i>-3.1</i></b> | <i>2.2</i>  | <b><i>-1.9</i></b> |       | <i>4.4</i>  | <i>0.3</i>         |     | <i>3.8</i>  | <i>-0.4</i>        |      | <i>4.2</i> | <i>0.1</i>         |      | <i>0.5</i> | <i>2.7</i>        |   | <i>-1.4</i>        | <i>3.3</i>        |   | <i>-0.8</i>        |                   |
| <i>Asp</i>               | <b><i>148</i></b> | <i>2.0</i>        | <i>2.0</i>        |   | \    | <i>6.9</i>  | <b><i>4.9</i></b>  | <i>1.1</i>  | <i>-0.9</i>        |       | <i>3.9</i>  | <b><i>1.9</i></b>  |     | <i>-1.0</i> | <b><i>-3.0</i></b> |      | <i>4.4</i> | <b><i>2.3</i></b>  |      | <i>3.6</i> | <i>-0.5</i>       |   | <i>-2.5</i>        | <i>1.3</i>        |   | <i>-0.7</i>        |                   |
| <i>Ctrl</i>              | <i>155</i>        | <i>3.4</i>        | <i>3.5</i>        |   | 0.8  | <i>3.7</i>  | <i>0.3</i>         | <i>2.7</i>  | <i>-0.7</i>        |       |             |                    |     | <i>2.2</i>  | <b><i>-1.3</i></b> |      | <i>2.4</i> | <i>-1.0</i>        |      | <i>1.7</i> | <i>3.7</i>        |   | <i>0.3</i>         | <i>3.4</i>        |   | <i>0.0</i>         |                   |
| <u><i>Glu</i></u>        | <u><i>6</i></u>   | <i>4.5</i>        | <i>4.5</i>        |   | 0.9  | <i>4.1</i>  | <i>-0.4</i>        | <i>6.3</i>  | <b><i>1.8</i></b>  |       | <i>4.3</i>  | <i>-0.2</i>        |     | <i>5.7</i>  | <b><i>1.2</i></b>  |      | <i>5.4</i> | <i>0.9</i>         |      | <i>1.1</i> | <i>5.1</i>        |   | <i>0.6</i>         | <i>3.9</i>        |   | <i>-0.6</i>        |                   |
| <u><i>Glu</i></u>        | <u><i>32</i></u>  | <i>3.6</i>        | <i>3.6</i>        |   | 0.73 | <i>1.3</i>  | <b><i>-2.3</i></b> | <i>2.1</i>  | <b><i>-1.5</i></b> |       | <i>1.6</i>  | <b><i>-2.0</i></b> |     | <i>1.5</i>  | <b><i>-2.1</i></b> |      | <i>3.3</i> | <i>-0.3</i>        |      | <i>0.5</i> | <i>2.5</i>        |   | <i>-1.1</i>        | <i>3.5</i>        |   | <i>-0.1</i>        |                   |
| <b><u><i>Glu</i></u></b> | <b><i>48</i></b>  | <i>4.4</i>        | <i>4.4</i>        |   | 0.75 | <i>5.3</i>  | <i>0.9</i>         | <i>5.5</i>  | <b><i>1.1</i></b>  |       | <i>6.4</i>  | <b><i>2.0</i></b>  |     | <i>5.2</i>  | <i>0.8</i>         |      | <i>5.1</i> | <i>0.7</i>         |      | <i>2.9</i> | <i>5.6</i>        |   | <b><i>1.2</i></b>  | <i>4.7</i>        |   | <i>0.3</i>         |                   |
| <u><i>Glu</i></u>        | <i>57</i>         | <b><i>3.2</i></b> | <b><i>3.4</i></b> |   | 1    | <i>1.7</i>  | <b><i>-1.5</i></b> | <i>2.5</i>  | <i>-0.8</i>        |       | <i>2.0</i>  | <b><i>-1.2</i></b> |     | <i>2.6</i>  | <i>-0.8</i>        |      | <i>4.5</i> | <b><i>1.3</i></b>  |      | <i>1.5</i> | <i>3.0</i>        |   | <i>-0.2</i>        | <i>3.3</i>        |   | <i>0.1</i>         |                   |
| <u><i>Glu</i></u>        | <i>61</i>         | <i>3.9</i>        | <i>4.0</i>        |   | 0.9  | <i>1.7</i>  | <b><i>-2.2</i></b> | <i>2.9</i>  | <b><i>-1.0</i></b> |       | <i>3.5</i>  | <i>-0.4</i>        |     | <i>0.5</i>  | <b><i>-3.5</i></b> |      | <i>3.5</i> | <i>-0.4</i>        |      | <i>0.7</i> | <i>3.3</i>        |   | <i>-0.6</i>        | <i>3.2</i>        |   | <i>-0.7</i>        |                   |
| <u><i>Glu</i></u>        | <i>64</i>         | <i>4.4</i>        | <i>4.5</i>        |   | 0.9  | <i>4.6</i>  | <i>0.2</i>         | <i>4.3</i>  | <i>-0.1</i>        |       | <i>2.9</i>  | <b><i>-1.5</i></b> |     | <i>4.8</i>  | <i>0.3</i>         |      | <i>5.3</i> | <i>0.9</i>         |      | <i>1.7</i> | <i>4.4</i>        |   | <i>-0.0</i>        | <i>4.3</i>        |   | <i>-0.1</i>        |                   |
| <b><u><i>Glu</i></u></b> | <b><i>119</i></b> | <i>4.1</i>        | <i>4.3</i>        |   | 0.75 | <i>-0.4</i> | <b><i>-4.5</i></b> | <i>3.1</i>  | <b><i>-1.0</i></b> |       | <i>4.4</i>  | <i>0.3</i>         |     | <i>5.8</i>  | <b><i>1.5</i></b>  |      | <i>5.3</i> | <b><i>1.2</i></b>  |      | <i>1.4</i> | <i>3.3</i>        |   | <i>-0.8</i>        | <i>3.9</i>        |   | <i>-0.2</i>        |                   |
| <b><u><i>Glu</i></u></b> | <b><i>129</i></b> | <b><i>3.6</i></b> | <b><i>4.0</i></b> |   | 0.7  | <i>0.0</i>  | <b><i>-3.6</i></b> | <i>2.8</i>  | <i>-0.8</i>        |       | <i>2.9</i>  | <i>-0.7</i>        |     | <i>2.5</i>  | <b><i>-1.5</i></b> |      | <i>2.2</i> | <b><i>-1.4</i></b> |      | <i>1.7</i> | <i>3.2</i>        |   | <i>-0.4</i>        | <i>3.0</i>        |   | <i>-0.6</i>        |                   |
| <u><i>Glu</i></u>        | <i>131</i>        | <i>4.3</i>        | <i>4.4</i>        |   | 0.85 | <i>5.1</i>  | <i>0.8</i>         | <i>5.0</i>  | <i>0.7</i>         |       | <i>3.4</i>  | <i>-0.9</i>        |     | <i>5.5</i>  | <b><i>1.1</i></b>  |      | <i>5.3</i> | <b><i>1.0</i></b>  |      | <i>1.2</i> | <i>5.0</i>        |   | <i>0.7</i>         | <i>4.8</i>        |   | <i>0.5</i>         |                   |
| <u><i>Glu</i></u>        | <i>135</i>        | <i>4.3</i>        | <i>4.3</i>        |   | 0.9  | <i>4.3</i>  | <i>-0.0</i>        | <i>4.3</i>  | <i>0.0</i>         |       | <i>3.5</i>  | <i>-0.8</i>        |     | <i>4.4</i>  | <i>0.1</i>         |      | <i>4.3</i> | <i>-0.0</i>        |      | <i>0.3</i> | <i>4.6</i>        |   | <i>0.3</i>         | <i>4.6</i>        |   | <i>0.3</i>         |                   |
| <u><i>Glu</i></u>        | <i>147</i>        | <i>4.2</i>        | <i>4.2</i>        |   | 1    | <i>4.3</i>  | <i>0.1</i>         | <i>4.4</i>  | <i>0.2</i>         |       | <i>4.9</i>  | <i>0.7</i>         |     | <i>4.5</i>  | <i>0.3</i>         |      | <i>4.2</i> | <i>-0.0</i>        |      | <i>0.5</i> | <i>4.7</i>        |   | <i>0.5</i>         | <i>4.7</i>        |   | <i>0.5</i>         |                   |
| <u><i>Glu</i></u>        | <i>154</i>        | <i>4.4</i>        | <i>4.4</i>        |   | 1    | <i>2.6</i>  | <b><i>-1.8</i></b> | <i>3.8</i>  | <i>-0.6</i>        |       |             |                    |     | <i>6.7</i>  | <b><i>2.3</i></b>  |      | <i>4.8</i> | <i>0.4</i>         |      | <i>0.6</i> | <i>4.0</i>        |   | <i>-0.4</i>        | <i>4.6</i>        |   | <i>0.2</i>         |                   |
| <i>His</i>               | <i>62</i>         | <i>7.0</i>        |                   |   | 0.9  | <i>5.7</i>  | <b><i>-1.3</i></b> | <i>6.7</i>  | <i>-0.3</i>        |       | <i>6.5</i>  | <i>-0.5</i>        |     | <i>6.4</i>  | <i>-0.6</i>        |      | <i>6.1</i> | <i>-0.9</i>        |      | <i>1.0</i> | <i>6.6</i>        |   | <i>-0.4</i>        | <i>6.5</i>        |   | <i>-0.5</i>        |                   |
| <i>His</i>               | <i>83</i>         | <i>5.5</i>        |                   |   | 1    | <i>5.4</i>  | <i>-0.1</i>        | <i>5.4</i>  | <i>-0.1</i>        |       | <i>4.8</i>  | <i>-0.7</i>        |     | <i>5.8</i>  | <i>0.3</i>         |      | <i>5.4</i> | <i>-0.1</i>        |      | <i>0.4</i> | <i>5.5</i>        |   | <i>0.0</i>         | <i>5.6</i>        |   | <i>0.1</i>         |                   |
| <i>His</i>               | <i>114</i>        | <i>5.0</i>        |                   |   | 0.9  | <i>4.2</i>  | <i>-0.8</i>        | <i>4.5</i>  | <i>-0.6</i>        |       | <i>4.2</i>  | <i>-0.8</i>        |     | <i>5.3</i>  | <i>0.3</i>         |      | <i>2.8</i> | <b><i>-2.2</i></b> |      | <i>3.1</i> | <i>4.8</i>        |   | <i>-0.2</i>        | <i>5.7</i>        |   | <i>0.7</i>         |                   |
| <i>His</i>               | <i>124</i>        | <i>7.1</i>        |                   |   | 0.85 | <i>4.5</i>  | <b><i>-2.6</i></b> | <i>4.5</i>  | <b><i>-2.6</i></b> |       | <i>8.7</i>  | <b><i>1.6</i></b>  |     | <i>4.9</i>  | <b><i>-2.2</i></b> |      | <i>4.7</i> | <b><i>-2.4</i></b> |      | <i>2.5</i> | <i>5.2</i>        |   | <b><i>-1.9</i></b> | <i>5.7</i>        |   | <b><i>-1.4</i></b> |                   |
| <u><i>His</i></u>        | <u><i>127</i></u> | <u><i>7.9</i></u> |                   |   | 0.9  | <i>8.1</i>  | <i>0.2</i>         | <i>7.0</i>  | <i>-0.9</i>        |       | <i>8.7</i>  | <i>0.8</i>         |     | <i>8.8</i>  | <i>0.9</i>         |      | <i>6.5</i> | <b><i>-1.4</i></b> |      | <i>1.7</i> | <i>7.3</i>        |   | <i>-0.6</i>        | <i>7.7</i>        |   | <i>-0.2</i>        |                   |
| RMS                      |                   |                   |                   |   |      |             | <b>2.75</b>        |             | <b>1.04</b>        |       |             | <b>1.06</b>        |     |             | <b>1.49</b>        |      |            | <b>1.15</b>        |      |            | <b>1.60</b>       |   |                    | <b>0.87</b>       |   |                    | <b>0.77</b>       |
| Conf                     |                   |                   |                   |   |      |             | <b>133</b>         |             | <b>512</b>         |       |             | <b>456</b>         |     |             | <b>365</b>         |      |            | <b>365</b>         |      |            | <b>396</b>        |   |                    | <b>268</b>        |   |                    |                   |

**SM-X. Ribonuclease T1 (RNase T1).**

X-ray structure: 3RNT (Kostrewa et al., 1989). Experimental values (Inagaki et al., 1981; McNutt et al., 1990).

|            | Expt      | ±   | n   | #3RNT | #Err. | *3RNT       | *Err. | ¶3RNT      | ¶Err. | 3RTN | Err. |             |
|------------|-----------|-----|-----|-------|-------|-------------|-------|------------|-------|------|------|-------------|
| His        | 27        | 7.3 | 0.1 | \     | 12.0  | <b>4.7</b>  | 8.0   | 0.7        | 7.6   | 0.3  | 7.8  | 0.5         |
| His        | 40        | 7.9 | 0.2 | \     | 13.0  | <b>5.1</b>  | 9.0   | <b>1.1</b> | 8.4   | 0.5  | 7.2  | -0.7        |
| His        | <u>92</u> | 7.8 | 0.2 | \     | 8.0   | 0.2         | 7.1   | -0.7       | 6.9   | -0.9 | 7.5  | <b>-0.3</b> |
| <b>Glu</b> | <b>58</b> | 4.3 | 0.2 | \     | -0.4  | <b>-4.7</b> | 4.5   | 0.2        | 4.2   | -0.1 | 5.2  | 0.9         |
| RMS        |           |     |     |       | 4.18  |             | 0.75  |            | 0.54  |      | 0.63 |             |
| Conf       |           |     |     |       | 95    |             | 395   |            | 316   |      | 244  |             |

### SM XI. Lennard-Jones parameters (kcal/mol).

$$\sigma G_{ij}^{non-el} = \frac{A}{r^{12}} - \frac{B}{r^6}.$$

Value varies for atom types. not-H\* are heavy atoms other than H, N, C, or O.

$\hat{A}$  where  $\Delta G^{lj}=0$  is the distance between atom centers where  $\sigma G_{ij}^{non-el}=0$ .

$E_{min}$  is the energy minimum for this atom pair is.

No Lennard-Jones interactions are determined for atoms in the same side chain or between CA (in the backbone) and CB (in the side chain) of the same residue.

| atoms         | A                     | B                     | $E_{min}$ | $\hat{A}$ where $\Delta G^{lj}=0$ |
|---------------|-----------------------|-----------------------|-----------|-----------------------------------|
| H : H         | 1.33x10 <sup>+1</sup> | 1.81X10 <sup>+0</sup> | -0.05     | 1.40                              |
| H : C         | 1.61X10 <sup>+3</sup> | 6.66X10 <sup>+1</sup> | -0.54     | 1.70                              |
| H : O         | 4.02X10 <sup>+2</sup> | 3.33X10 <sup>+1</sup> | -0.54     | 1.51                              |
| H : N         | 6.27X10 <sup>+2</sup> | 3.73X10 <sup>+1</sup> | -0.44     | 1.60                              |
| H : not-H*    | 1.61X10 <sup>+3</sup> | 6.66X10 <sup>+1</sup> | -0.54     | 1.70                              |
| not-H : not-H | 2.96X10 <sup>+5</sup> | 1.05X10 <sup>+2</sup> | -0.01     | 3.76                              |

### SM XII. Reaction field energies (kcal/mol) for isolated side chains.

Energy for transfer from a medium with a dielectric constant of  $\epsilon_{\text{prot}}$  of 4, 8, or 20 to a solvent with  $\epsilon=80$ .  $\Delta\Delta G_{\text{rxn},i}$  (in eqn. 3) is the difference between this reference value and the reaction field energy for a conformer in the protein.  $\Delta\Delta G_{\text{rxn},i}$  is constrained to have a minimum of 0.

| Residue                       | $\epsilon=4.0$ | $\epsilon=4.0$ | $\epsilon=8.0$ | $\epsilon=0$ | $\epsilon=20.0$ | $\epsilon=20.0$ |
|-------------------------------|----------------|----------------|----------------|--------------|-----------------|-----------------|
|                               | ionized        | neutral        | ionized        | neutral      | ionized         | neutral         |
| ASP                           | 18.1           | 2.1            | 8.7            | 1.1          | 2.9             | 0.3             |
| CTR                           | 16.6           | 1.5            | 7.9            | 0.8          | 2.6             | 0.2             |
| GLU                           | 18.7           | 2.2            | 8.9            | 1.1          | 2.9             | 0.4             |
| HIS                           | 11.8           | 1.8            | 5.7            | 0.9          | 2.1             | 0.3             |
| LYS                           | 19.6           | 1.1            | 9.8            | 0.6          | 3.2             | 0.2             |
| TYR                           | 15.2           | 1.2            | 7.3            | 1.1          | 2.4             | 0.3             |
| NTR                           | 13.3           | 1.8            | 6.7            | 0.9          | 2.1             | 0.3             |
| ARG                           | 12.8           | 3.4            | 8.0            | 1.7          | 2.9             | 0.5             |
| ASN                           |                | 5.9            |                | 1.7          |                 | 0.5             |
| GLN                           |                | 5.9            |                | 1.7          |                 | 0.5             |
| SER                           |                | 1.8            |                | 0.8          |                 | 0.3             |
| THR                           |                | 1.8            |                | 0.8          |                 | 0.2             |
| HOH                           |                | 3.6            |                | 2.4          |                 | 1.1             |
| PO <sub>4</sub> <sup>-2</sup> | 62.1           |                | 32.5           |              | 14.8            |                 |
| Mg <sup>+2</sup>              | 17.8           |                | 8.9            |              | 4.7             |                 |
